# Supplementary material for: Transient turbid water mass reduces temperature-induced coral bleaching and mortality in Barbados
Source: PeerJ. 2016 Jun 14;4:e2118. doi: 10.7717/peerj.2118 (PMC4911954; doi:10.7717/peerj.2118)
Supplement: Data S1 — Raw data showing the number of coral colonies per transect per reef per period that were bleached or affected by tissue mortality. [file peerj-04-2118-s002.xlsx]

## Sheet: Bleached, healthy & newly dead 
Reef name	Period	Month	Transect	SpeCorr	B	H	RD	TranID	Total (B+H)	Prop Bleached
Atlantis	P1	M1	1	DSTR	0	2	0	1	2	0
Atlantis	P1	M1	1	ORBI	17	0	0	1	17	1
Atlantis	P1	M1	1	MCAV	12	11	0	1	23	0.521739
Atlantis	P1	M1	1	PAST	14	10	0	1	24	0.583333
Atlantis	P1	M1	1	SSID	16	0	0	1	16	1
Atlantis	P1	M1	2	DSTR	6	4	0	2	10	0.6
Atlantis	P1	M1	2	ORBI	7	6	0	2	13	0.538462
Atlantis	P1	M1	2	MCAV	6	6	0	2	12	0.5
Atlantis	P1	M1	2	PAST	10	3	0	2	13	0.769231
Atlantis	P1	M1	2	SSID	7	7	0	2	14	0.5
Atlantis	P1	M1	3	DSTR	0	3	0	3	3	0
Atlantis	P1	M1	3	ORBI	14	0	0	3	14	1
Atlantis	P1	M1	3	MCAV	6	8	0	3	14	0.428571
Atlantis	P1	M1	3	PAST	2	12	0	3	14	0.142857
Atlantis	P1	M1	3	SSID	14	2	0	3	16	0.875
Atlantis	P1	M1	4	DSTR	0	1	0	4	1	0
Atlantis	P1	M1	4	ORBI	16	1	0	4	17	0.941176
Atlantis	P1	M1	4	MCAV	1	1	0	4	2	0.5
Atlantis	P1	M1	4	PAST	2	3	0	4	5	0.4
Atlantis	P1	M1	4	SSID	11	1	0	4	12	0.916667
Atlantis	P1	M1	5	DSTR	3	3	0	5	6	0.5
Atlantis	P1	M1	5	ORBI	3	0	0	5	3	1
Atlantis	P1	M1	5	MCAV	5	7	0	5	12	0.416667
Atlantis	P1	M1	5	PAST	4	7	0	5	11	0.363636
Atlantis	P1	M1	5	SSID	18	0	0	5	18	1
Atlantis	P1	M2	1	DSTR	0	3	0	6	3	0
Atlantis	P1	M2	1	ORBI	5	26	0	6	31	0.16129
Atlantis	P1	M2	1	MCAV	0	20	0	6	20	0
Atlantis	P1	M2	1	PAST	0	31	0	6	31	0
Atlantis	P1	M2	1	SSID	0	10	0	6	10	0
Atlantis	P1	M2	2	DSTR	0	6	0	7	6	0
Atlantis	P1	M2	2	ORBI	10	15	0	7	25	0.4
Atlantis	P1	M2	2	MCAV	0	28	0	7	28	0
Atlantis	P1	M2	2	PAST	0	20	0	7	20	0
Atlantis	P1	M2	2	SSID	1	14	0	7	15	0.0666667
Atlantis	P1	M2	3	DSTR	0	5	0	8	5	0
Atlantis	P1	M2	3	ORBI	8	6	0	8	14	0.571429
Atlantis	P1	M2	3	MCAV	1	38	0	8	39	0.025641
Atlantis	P1	M2	3	PAST	0	20	0	8	20	0
Atlantis	P1	M2	3	SSID	9	10	0	8	19	0.473684
Atlantis	P1	M2	4	DSTR	0	4	0	9	4	0
Atlantis	P1	M2	4	ORBI	0	15	0	9	15	0
Atlantis	P1	M2	4	MCAV	0	16	0	9	16	0
Atlantis	P1	M2	4	PAST	0	15	0	9	15	0
Atlantis	P1	M2	4	SSID	1	15	0	9	16	0.0625
Atlantis	P1	M2	5	DSTR	0	6	0	10	6	0
Atlantis	P1	M2	5	ORBI	0	17	1	10	17	0
Atlantis	P1	M2	5	MCAV	0	21	1	10	21	0
Atlantis	P1	M2	5	PAST	0	12	0	10	12	0
Atlantis	P1	M2	5	SSID	0	11	0	10	11	0
Atlantis	P1	M3	1	DSTR	0	15	0	11	15	0
Atlantis	P1	M3	1	ORBI	2	40	4	11	42	0.047619
Atlantis	P1	M3	1	MCAV	0	31	1	11	31	0
Atlantis	P1	M3	1	PAST	0	62	1	11	62	0
Atlantis	P1	M3	1	SSID	0	33	3	11	33	0
Atlantis	P1	M3	2	DSTR	0	9	0	12	9	0
Atlantis	P1	M3	2	ORBI	8	32	5	12	40	0.2
Atlantis	P1	M3	2	MCAV	0	26	1	12	26	0
Atlantis	P1	M3	2	PAST	1	39	0	12	40	0.025
Atlantis	P1	M3	2	SSID	0	16	0	12	16	0
Atlantis	P1	M3	3	DSTR	0	7	1	13	7	0
Atlantis	P1	M3	3	ORBI	2	20	2	13	22	0.0909091
Atlantis	P1	M3	3	MCAV	2	20	2	13	22	0.0909091
Atlantis	P1	M3	3	PAST	0	27	0	13	27	0
Atlantis	P1	M3	3	SSID	3	8	4	13	11	0.272727
Atlantis	P1	M3	5	DSTR	0	10	0	14	10	0
Atlantis	P1	M3	5	ORBI	1	41	2	14	42	0.0238095
Atlantis	P1	M3	5	MCAV	0	53	0	14	53	0
Atlantis	P1	M3	5	PAST	0	58	0	14	58	0
Atlantis	P1	M3	5	SSID	0	13	0	14	13	0
Atlantis	P2	M1	11	DSTR	0	6	0	15	6	0
Atlantis	P2	M1	11	ORBI	9	32	0	15	41	0.219512
Atlantis	P2	M1	11	MCAV	2	13	0	15	15	0.133333
Atlantis	P2	M1	11	PAST	0	42	1	15	42	0
Atlantis	P2	M1	11	SSID	3	8	0	15	11	0.272727
Atlantis	P2	M1	12	DSTR	0	11	0	16	11	0
Atlantis	P2	M1	12	ORBI	4	21	0	16	25	0.16
Atlantis	P2	M1	12	MCAV	5	29	0	16	34	0.147059
Atlantis	P2	M1	12	PAST	0	67	1	16	67	0
Atlantis	P2	M1	12	SSID	1	10	0	16	11	0.0909091
Atlantis	P2	M1	14	DSTR	0	6	0	17	6	0
Atlantis	P2	M1	14	ORBI	6	41	0	17	47	0.12766
Atlantis	P2	M1	14	MCAV	2	30	0	17	32	0.0625
Atlantis	P2	M1	14	PAST	0	48	1	17	48	0
Atlantis	P2	M1	14	SSID	3	8	0	17	11	0.272727
Atlantis	P2	M1	20	DSTR	0	3	0	18	3	0
Atlantis	P2	M1	20	ORBI	2	24	0	18	26	0.0769231
Atlantis	P2	M1	20	MCAV	1	23	0	18	24	0.0416667
Atlantis	P2	M1	20	PAST	0	41	0	18	41	0
Atlantis	P2	M1	20	SSID	8	12	0	18	20	0.4
Atlantis	P2	M1	21	DSTR	0	9	0	19	9	0
Atlantis	P2	M1	21	ORBI	15	15	0	19	30	0.5
Atlantis	P2	M1	21	MCAV	2	23	0	19	25	0.08
Atlantis	P2	M1	21	PAST	0	48	0	19	48	0
Atlantis	P2	M1	21	SSID	12	2	0	19	14	0.857143
Atlantis	P2	M2	37	DSTR	0	8	0	20	8	0
Atlantis	P2	M2	37	ORBI	0	17	0	20	17	0
Atlantis	P2	M2	37	MCAV	0	44	0	20	44	0
Atlantis	P2	M2	37	PAST	0	46	0	20	46	0
Atlantis	P2	M2	37	SSID	0	6	0	20	6	0
Atlantis	P2	M2	38	DSTR	0	5	0	21	5	0
Atlantis	P2	M2	38	ORBI	0	15	0	21	15	0
Atlantis	P2	M2	38	MCAV	0	15	0	21	15	0
Atlantis	P2	M2	38	PAST	0	7	0	21	7	0
Atlantis	P2	M2	38	SSID	0	18	0	21	18	0
Atlantis	P2	M2	39	DSTR	0	13	0	22	13	0
Atlantis	P2	M2	39	ORBI	0	26	0	22	26	0
Atlantis	P2	M2	39	MCAV	0	47	0	22	47	0
Atlantis	P2	M2	39	PAST	0	48	1	22	48	0
Atlantis	P2	M2	39	SSID	0	22	0	22	22	0
Atlantis	P2	M2	56	DSTR	0	4	0	23	4	0
Atlantis	P2	M2	56	ORBI	1	12	0	23	13	0.0769231
Atlantis	P2	M2	56	MCAV	0	16	0	23	16	0
Atlantis	P2	M2	56	PAST	0	31	0	23	31	0
Atlantis	P2	M2	56	SSID	0	17	0	23	17	0
Atlantis	P2	M2	57	DSTR	0	5	0	24	5	0
Atlantis	P2	M2	57	ORBI	0	16	0	24	16	0
Atlantis	P2	M2	57	MCAV	0	24	0	24	24	0
Atlantis	P2	M2	57	PAST	0	21	0	24	21	0
Atlantis	P2	M2	57	SSID	0	16	0	24	16	0
Atlantis	P2	M3	73	DSTR	0	5	1	25	5	0
Atlantis	P2	M3	73	ORBI	0	20	0	25	20	0
Atlantis	P2	M3	73	MCAV	0	54	0	25	54	0
Atlantis	P2	M3	73	PAST	0	40	0	25	40	0
Atlantis	P2	M3	73	SSID	0	15	0	25	15	0
Atlantis	P2	M3	74	DSTR	0	2	0	26	2	0
Atlantis	P2	M3	74	ORBI	1	32	0	26	33	0.030303
Atlantis	P2	M3	74	MCAV	0	20	0	26	20	0
Atlantis	P2	M3	74	PAST	0	58	0	26	58	0
Atlantis	P2	M3	74	SSID	1	19	0	26	20	0.05
Atlantis	P2	M3	75	DSTR	0	5	0	27	5	0
Atlantis	P2	M3	75	ORBI	0	27	1	27	27	0
Atlantis	P2	M3	75	MCAV	0	35	0	27	35	0
Atlantis	P2	M3	75	PAST	0	65	1	27	65	0
Atlantis	P2	M3	75	SSID	1	10	2	27	11	0.0909091
Atlantis	P2	M3	76	DSTR	0	12	0	28	12	0
Atlantis	P2	M3	76	ORBI	0	17	0	28	17	0
Atlantis	P2	M3	76	MCAV	0	35	0	28	35	0
Atlantis	P2	M3	76	PAST	0	42	0	28	42	0
Atlantis	P2	M3	76	SSID	0	15	0	28	15	0
Atlantis	P2	M3	77	DSTR	0	6	0	29	6	0
Atlantis	P2	M3	77	ORBI	0	16	1	29	16	0
Atlantis	P2	M3	77	MCAV	0	12	0	29	12	0
Atlantis	P2	M3	77	PAST	0	36	1	29	36	0
Atlantis	P2	M3	77	SSID	0	5	1	29	5	0
Batts Rock	P1	M1	1	DSTR	4	1	0	30	5	0.8
Batts Rock	P1	M1	1	ORBI	41	3	0	30	44	0.931818
Batts Rock	P1	M1	1	PAST	23	3	0	30	26	0.884615
Batts Rock	P1	M1	1	SSID	1	0	0	30	1	1
Batts Rock	P1	M1	2	DSTR	5	3	0	31	8	0.625
Batts Rock	P1	M1	2	ORBI	45	5	0	31	50	0.9
Batts Rock	P1	M1	2	PAST	2	9	0	31	11	0.181818
Batts Rock	P1	M1	2	SSID	2	0	0	31	2	1
Batts Rock	P1	M1	3	DSTR	1	0	0	32	1	1
Batts Rock	P1	M1	3	ORBI	35	0	0	32	35	1
Batts Rock	P1	M1	3	MCAV	2	0	0	32	2	1
Batts Rock	P1	M1	3	PAST	22	12	0	32	34	0.647059
Batts Rock	P1	M1	3	SSID	3	1	0	32	4	0.75
Batts Rock	P1	M1	4	DSTR	2	5	0	33	7	0.285714
Batts Rock	P1	M1	4	ORBI	35	52	0	33	87	0.402299
Batts Rock	P1	M1	4	MCAV	0	2	0	33	2	0
Batts Rock	P1	M1	4	PAST	3	17	0	33	20	0.15
Batts Rock	P1	M1	4	SSID	2	1	0	33	3	0.666667
Batts Rock	P1	M1	5	DSTR	0	2	0	34	2	0
Batts Rock	P1	M1	5	ORBI	26	42	0	34	68	0.382353
Batts Rock	P1	M1	5	MCAV	0	1	0	34	1	0
Batts Rock	P1	M1	5	PAST	15	14	0	34	29	0.517241
Batts Rock	P1	M1	5	SSID	1	3	0	34	4	0.25
Batts Rock	P1	M2	1	DSTR	0	1	0	35	1	0
Batts Rock	P1	M2	1	ORBI	41	299	0	35	340	0.120588
Batts Rock	P1	M2	1	MCAV	1	6	0	35	7	0.142857
Batts Rock	P1	M2	1	PAST	0	26	0	35	26	0
Batts Rock	P1	M2	1	SSID	1	7	0	35	8	0.125
Batts Rock	P1	M2	2	DSTR	1	1	0	36	2	0.5
Batts Rock	P1	M2	2	ORBI	2	111	0	36	113	0.0176991
Batts Rock	P1	M2	2	MCAV	0	3	0	36	3	0
Batts Rock	P1	M2	2	PAST	0	12	0	36	12	0
Batts Rock	P1	M2	2	SSID	0	4	0	36	4	0
Batts Rock	P1	M2	3	DSTR	0	2	0	37	2	0
Batts Rock	P1	M2	3	ORBI	15	35	0	37	50	0.3
Batts Rock	P1	M2	3	MCAV	0	2	0	37	2	0
Batts Rock	P1	M2	3	PAST	0	5	0	37	5	0
Batts Rock	P1	M2	3	SSID	0	4	0	37	4	0
Batts Rock	P1	M2	4	DSTR	0	1	0	38	1	0
Batts Rock	P1	M2	4	ORBI	0	30	0	38	30	0
Batts Rock	P1	M2	4	MCAV	0	1	0	38	1	0
Batts Rock	P1	M2	4	PAST	0	10	0	38	10	0
Batts Rock	P1	M2	4	SSID	0	2	0	38	2	0
Batts Rock	P1	M2	5	DSTR	0	2	0	39	2	0
Batts Rock	P1	M2	5	ORBI	1	53	0	39	54	0.0185185
Batts Rock	P1	M2	5	MCAV	0	2	0	39	2	0
Batts Rock	P1	M2	5	PAST	0	4	0	39	4	0
Batts Rock	P1	M2	5	SSID	0	2	0	39	2	0
Batts Rock	P1	M3	1	DSTR	0	11	0	40	11	0
Batts Rock	P1	M3	1	ORBI	1	111	4	40	112	0.00892857
Batts Rock	P1	M3	1	MCAV	0	3	0	40	3	0
Batts Rock	P1	M3	1	PAST	0	59	1	40	59	0
Batts Rock	P1	M3	1	SSID	0	14	1	40	14	0
Batts Rock	P1	M3	2	DSTR	0	16	0	41	16	0
Batts Rock	P1	M3	2	ORBI	3	49	0	41	52	0.0576923
Batts Rock	P1	M3	2	PAST	0	47	0	41	47	0
Batts Rock	P1	M3	2	SSID	0	9	0	41	9	0
Batts Rock	P1	M3	3	DSTR	0	7	0	42	7	0
Batts Rock	P1	M3	3	ORBI	4	266	45	42	270	0.0148148
Batts Rock	P1	M3	3	PAST	0	25	0	42	25	0
Batts Rock	P1	M3	3	SSID	0	5	0	42	5	0
Batts Rock	P1	M3	5	DSTR	0	3	1	43	3	0
Batts Rock	P1	M3	5	ORBI	0	131	3	43	131	0
Batts Rock	P1	M3	5	MCAV	0	3	0	43	3	0
Batts Rock	P1	M3	5	PAST	0	25	0	43	25	0
Batts Rock	P1	M3	5	SSID	0	9	0	43	9	0
Batts Rock	P2	M1	1	DSTR	2	9	0	44	11	0.181818
Batts Rock	P2	M1	1	ORBI	11	55	0	44	66	0.166667
Batts Rock	P2	M1	1	MCAV	1	1	0	44	2	0.5
Batts Rock	P2	M1	1	PAST	0	45	0	44	45	0
Batts Rock	P2	M1	1	SSID	1	7	0	44	8	0.125
Batts Rock	P2	M1	2	DSTR	0	6	0	45	6	0
Batts Rock	P2	M1	2	ORBI	8	74	0	45	82	0.097561
Batts Rock	P2	M1	2	PAST	0	31	0	45	31	0
Batts Rock	P2	M1	2	SSID	0	7	0	45	7	0
Batts Rock	P2	M1	6	DSTR	0	3	0	46	3	0
Batts Rock	P2	M1	6	ORBI	3	40	0	46	43	0.0697674
Batts Rock	P2	M1	6	PAST	0	9	0	46	9	0
Batts Rock	P2	M1	6	SSID	0	2	0	46	2	0
Batts Rock	P2	M1	7	DSTR	0	1	0	47	1	0
Batts Rock	P2	M1	7	ORBI	10	71	0	47	81	0.123457
Batts Rock	P2	M1	7	MCAV	0	2	0	47	2	0
Batts Rock	P2	M1	7	PAST	0	28	0	47	28	0
Batts Rock	P2	M1	7	SSID	1	3	0	47	4	0.25
Batts Rock	P2	M1	9	DSTR	0	5	0	48	5	0
Batts Rock	P2	M1	9	ORBI	13	78	0	48	91	0.142857
Batts Rock	P2	M1	9	MCAV	0	3	0	48	3	0
Batts Rock	P2	M1	9	PAST	0	46	0	48	46	0
Batts Rock	P2	M1	9	SSID	0	3	0	48	3	0
Batts Rock	P2	M2	53	DSTR	0	2	0	49	2	0
Batts Rock	P2	M2	53	ORBI	0	96	0	49	96	0
Batts Rock	P2	M2	53	MCAV	0	4	0	49	4	0
Batts Rock	P2	M2	53	PAST	0	25	0	49	25	0
Batts Rock	P2	M2	53	SSID	0	6	0	49	6	0
Batts Rock	P2	M2	54	DSTR	0	4	0	50	4	0
Batts Rock	P2	M2	54	ORBI	1	73	0	50	74	0.0135135
Batts Rock	P2	M2	54	MCAV	0	5	0	50	5	0
Batts Rock	P2	M2	54	PAST	0	19	0	50	19	0
Batts Rock	P2	M2	54	SSID	0	9	0	50	9	0
Batts Rock	P2	M2	55	DSTR	0	3	0	51	3	0
Batts Rock	P2	M2	55	ORBI	0	63	0	51	63	0
Batts Rock	P2	M2	55	MCAV	0	6	0	51	6	0
Batts Rock	P2	M2	55	PAST	0	13	0	51	13	0
Batts Rock	P2	M2	55	SSID	0	3	0	51	3	0
Batts Rock	P2	M2	58	DSTR	0	7	0	52	7	0
Batts Rock	P2	M2	58	ORBI	0	98	0	52	98	0
Batts Rock	P2	M2	58	MCAV	0	3	0	52	3	0
Batts Rock	P2	M2	58	PAST	0	17	0	52	17	0
Batts Rock	P2	M2	58	SSID	0	6	0	52	6	0
Batts Rock	P2	M2	59	DSTR	0	6	0	53	6	0
Batts Rock	P2	M2	59	ORBI	0	99	0	53	99	0
Batts Rock	P2	M2	59	MCAV	0	1	0	53	1	0
Batts Rock	P2	M2	59	PAST	0	11	0	53	11	0
Batts Rock	P2	M2	59	SSID	0	1	0	53	1	0
Batts Rock	P2	M3	78	DSTR	0	7	0	54	7	0
Batts Rock	P2	M3	78	ORBI	0	100	0	54	100	0
Batts Rock	P2	M3	78	MCAV	0	1	0	54	1	0
Batts Rock	P2	M3	78	PAST	0	35	0	54	35	0
Batts Rock	P2	M3	78	SSID	0	3	0	54	3	0
Batts Rock	P2	M3	79	DSTR	0	9	0	55	9	0
Batts Rock	P2	M3	79	ORBI	0	108	0	55	108	0
Batts Rock	P2	M3	79	MCAV	0	2	0	55	2	0
Batts Rock	P2	M3	79	PAST	0	49	0	55	49	0
Batts Rock	P2	M3	79	SSID	0	6	0	55	6	0
Batts Rock	P2	M3	80	DSTR	0	8	0	56	8	0
Batts Rock	P2	M3	80	ORBI	0	122	0	56	122	0
Batts Rock	P2	M3	80	MCAV	0	1	0	56	1	0
Batts Rock	P2	M3	80	PAST	0	85	0	56	85	0
Batts Rock	P2	M3	80	SSID	0	4	0	56	4	0
Batts Rock	P2	M3	81	DSTR	0	6	0	57	6	0
Batts Rock	P2	M3	81	ORBI	0	129	0	57	129	0
Batts Rock	P2	M3	81	MCAV	0	5	0	57	5	0
Batts Rock	P2	M3	81	PAST	0	24	0	57	24	0
Batts Rock	P2	M3	81	SSID	0	2	0	57	2	0
Batts Rock	P2	M3	82	DSTR	0	5	0	58	5	0
Batts Rock	P2	M3	82	ORBI	0	43	1	58	43	0
Batts Rock	P2	M3	82	MCAV	0	1	0	58	1	0
Batts Rock	P2	M3	82	PAST	0	11	0	58	11	0
Batts Rock	P2	M3	82	SSID	0	3	1	58	3	0
Coconut Court	P1	M1	1	DSTR	50	0	0	59	50	1
Coconut Court	P1	M1	1	MCAV	7	1	0	59	8	0.875
Coconut Court	P1	M1	1	PAST	55	9	0	59	64	0.859375
Coconut Court	P1	M1	1	SSID	5	5	0	59	10	0.5
Coconut Court	P1	M1	2	DSTR	46	1	0	60	47	0.978723
Coconut Court	P1	M1	2	MCAV	9	0	0	60	9	1
Coconut Court	P1	M1	2	PAST	85	11	0	60	96	0.885417
Coconut Court	P1	M1	2	SSID	3	5	0	60	8	0.375
Coconut Court	P1	M1	3	DSTR	3	0	0	61	3	1
Coconut Court	P1	M1	3	PAST	63	15	0	61	78	0.807692
Coconut Court	P1	M1	3	SSID	1	5	0	61	6	0.166667
Coconut Court	P1	M1	4	DSTR	2	0	0	62	2	1
Coconut Court	P1	M1	4	PAST	47	9	0	62	56	0.839286
Coconut Court	P1	M1	4	SSID	1	1	0	62	2	0.5
Coconut Court	P1	M1	5	DSTR	5	0	0	63	5	1
Coconut Court	P1	M1	5	PAST	72	8	0	63	80	0.9
Coconut Court	P1	M1	5	SSID	2	2	0	63	4	0.5
Coconut Court	P1	M2	1	DSTR	0	20	0	64	20	0
Coconut Court	P1	M2	1	MCAV	0	6	0	64	6	0
Coconut Court	P1	M2	1	PAST	0	37	0	64	37	0
Coconut Court	P1	M2	1	SSID	0	2	0	64	2	0
Coconut Court	P1	M2	2	DSTR	0	47	0	65	47	0
Coconut Court	P1	M2	2	ORBI	0	1	0	65	1	0
Coconut Court	P1	M2	2	MCAV	0	6	0	65	6	0
Coconut Court	P1	M2	2	PAST	0	40	0	65	40	0
Coconut Court	P1	M2	2	SSID	0	5	0	65	5	0
Coconut Court	P1	M2	3	DSTR	0	35	0	66	35	0
Coconut Court	P1	M2	3	MCAV	0	8	0	66	8	0
Coconut Court	P1	M2	3	PAST	0	18	0	66	18	0
Coconut Court	P1	M2	3	SSID	0	10	0	66	10	0
Coconut Court	P1	M2	4	DSTR	0	58	0	67	58	0
Coconut Court	P1	M2	4	ORBI	0	1	0	67	1	0
Coconut Court	P1	M2	4	MCAV	0	8	0	67	8	0
Coconut Court	P1	M2	4	PAST	0	16	0	67	16	0
Coconut Court	P1	M2	4	SSID	0	6	0	67	6	0
Coconut Court	P1	M2	5	DSTR	0	28	0	68	28	0
Coconut Court	P1	M2	5	MCAV	0	8	0	68	8	0
Coconut Court	P1	M2	5	PAST	0	18	0	68	18	0
Coconut Court	P1	M2	5	SSID	0	3	0	68	3	0
Coconut Court	P1	M3	1	DSTR	0	106	1	69	106	0
Coconut Court	P1	M3	1	ORBI	0	5	0	69	5	0
Coconut Court	P1	M3	1	MCAV	0	14	0	69	14	0
Coconut Court	P1	M3	1	PAST	0	92	0	69	92	0
Coconut Court	P1	M3	1	SSID	0	17	0	69	17	0
Coconut Court	P1	M3	2	DSTR	0	81	0	70	81	0
Coconut Court	P1	M3	2	ORBI	0	1	0	70	1	0
Coconut Court	P1	M3	2	MCAV	0	16	0	70	16	0
Coconut Court	P1	M3	2	PAST	0	138	0	70	138	0
Coconut Court	P1	M3	2	SSID	0	21	0	70	21	0
Coconut Court	P1	M3	3	DSTR	0	23	0	71	23	0
Coconut Court	P1	M3	3	MCAV	0	7	0	71	7	0
Coconut Court	P1	M3	3	PAST	0	78	2	71	78	0
Coconut Court	P1	M3	3	SSID	0	13	0	71	13	0
Coconut Court	P1	M3	5	DSTR	0	33	0	72	33	0
Coconut Court	P1	M3	5	MCAV	0	4	0	72	4	0
Coconut Court	P1	M3	5	PAST	0	76	0	72	76	0
Coconut Court	P1	M3	5	SSID	0	3	0	72	3	0
Coconut Court	P2	M1	15	DSTR	0	49	0	73	49	0
Coconut Court	P2	M1	15	MCAV	0	5	0	73	5	0
Coconut Court	P2	M1	15	PAST	1	408	13	73	409	0.00244499
Coconut Court	P2	M1	15	SSID	0	16	0	73	16	0
Coconut Court	P2	M1	16	DSTR	0	42	0	74	42	0
Coconut Court	P2	M1	16	ORBI	0	1	0	74	1	0
Coconut Court	P2	M1	16	MCAV	2	6	0	74	8	0.25
Coconut Court	P2	M1	16	PAST	0	168	0	74	168	0
Coconut Court	P2	M1	16	SSID	0	5	0	74	5	0
Coconut Court	P2	M1	17	DSTR	1	49	0	75	50	0.02
Coconut Court	P2	M1	17	MCAV	2	7	0	75	9	0.222222
Coconut Court	P2	M1	17	PAST	1	187	0	75	188	0.00531915
Coconut Court	P2	M1	17	SSID	0	13	0	75	13	0
Coconut Court	P2	M1	18	DSTR	0	46	0	76	46	0
Coconut Court	P2	M1	18	ORBI	0	1	0	76	1	0
Coconut Court	P2	M1	18	MCAV	1	3	0	76	4	0.25
Coconut Court	P2	M1	18	PAST	0	387	1	76	387	0
Coconut Court	P2	M1	18	SSID	0	23	0	76	23	0
Coconut Court	P2	M1	19	DSTR	0	36	0	77	36	0
Coconut Court	P2	M1	19	MCAV	3	2	0	77	5	0.6
Coconut Court	P2	M1	19	PAST	2	160	0	77	162	0.0123457
Coconut Court	P2	M1	19	SSID	0	8	0	77	8	0
Coconut Court	P2	M2	45	DSTR	0	50	0	78	50	0
Coconut Court	P2	M2	45	ORBI	0	2	0	78	2	0
Coconut Court	P2	M2	45	MCAV	0	8	0	78	8	0
Coconut Court	P2	M2	45	PAST	0	166	0	78	166	0
Coconut Court	P2	M2	45	SSID	0	13	0	78	13	0
Coconut Court	P2	M2	46	DSTR	0	25	0	79	25	0
Coconut Court	P2	M2	46	MCAV	0	1	0	79	1	0
Coconut Court	P2	M2	46	PAST	0	110	0	79	110	0
Coconut Court	P2	M2	46	SSID	0	10	0	79	10	0
Coconut Court	P2	M2	47	DSTR	0	42	0	80	42	0
Coconut Court	P2	M2	47	MCAV	0	4	0	80	4	0
Coconut Court	P2	M2	47	PAST	0	212	0	80	212	0
Coconut Court	P2	M2	47	SSID	0	15	0	80	15	0
Coconut Court	P2	M2	48	DSTR	0	38	0	81	38	0
Coconut Court	P2	M2	48	MCAV	0	5	0	81	5	0
Coconut Court	P2	M2	48	PAST	0	205	0	81	205	0
Coconut Court	P2	M2	48	SSID	0	11	0	81	11	0
Coconut Court	P2	M2	49	DSTR	0	31	0	82	31	0
Coconut Court	P2	M2	49	MCAV	0	3	0	82	3	0
Coconut Court	P2	M2	49	PAST	0	147	0	82	147	0
Coconut Court	P2	M2	49	SSID	0	11	0	82	11	0
Coconut Court	P2	M3	58	DSTR	0	54	0	83	54	0
Coconut Court	P2	M3	58	MCAV	0	5	0	83	5	0
Coconut Court	P2	M3	58	PAST	0	209	0	83	209	0
Coconut Court	P2	M3	58	SSID	0	7	0	83	7	0
Coconut Court	P2	M3	59	DSTR	0	28	0	84	28	0
Coconut Court	P2	M3	59	ORBI	0	1	0	84	1	0
Coconut Court	P2	M3	59	MCAV	0	9	0	84	9	0
Coconut Court	P2	M3	59	PAST	0	368	0	84	368	0
Coconut Court	P2	M3	59	SSID	0	9	0	84	9	0
Coconut Court	P2	M3	60	DSTR	0	60	0	85	60	0
Coconut Court	P2	M3	60	ORBI	0	1	0	85	1	0
Coconut Court	P2	M3	60	MCAV	0	6	0	85	6	0
Coconut Court	P2	M3	60	PAST	0	220	1	85	220	0
Coconut Court	P2	M3	60	SSID	0	25	0	85	25	0
Coconut Court	P2	M3	61	DSTR	0	39	0	86	39	0
Coconut Court	P2	M3	61	ORBI	0	1	0	86	1	0
Coconut Court	P2	M3	61	MCAV	0	3	0	86	3	0
Coconut Court	P2	M3	61	PAST	0	118	0	86	118	0
Coconut Court	P2	M3	61	SSID	0	9	0	86	9	0
Coconut Court	P2	M3	62	DSTR	0	35	0	87	35	0
Coconut Court	P2	M3	62	ORBI	0	1	0	87	1	0
Coconut Court	P2	M3	62	MCAV	0	8	0	87	8	0
Coconut Court	P2	M3	62	PAST	0	195	0	87	195	0
Coconut Court	P2	M3	62	SSID	0	1	2	87	1	0
Maycocks	P1	M1	1	DSTR	1	1	0	88	2	0.5
Maycocks	P1	M1	1	ORBI	10	4	0	88	14	0.714286
Maycocks	P1	M1	1	MCAV	1	6	0	88	7	0.142857
Maycocks	P1	M1	1	PAST	1	7	0	88	8	0.125
Maycocks	P1	M1	1	SSID	9	0	0	88	9	1
Maycocks	P1	M1	2	PAST	3	6	0	89	9	0.333333
Maycocks	P1	M1	2	SSID	4	0	0	89	4	1
Maycocks	P1	M1	3	PAST	1	10	0	90	11	0.0909091
Maycocks	P1	M1	3	SSID	3	0	0	90	3	1
Maycocks	P1	M1	4	DSTR	1	2	0	91	3	0.333333
Maycocks	P1	M1	4	ORBI	15	3	0	91	18	0.833333
Maycocks	P1	M1	4	MCAV	4	7	0	91	11	0.363636
Maycocks	P1	M1	4	PAST	8	7	0	91	15	0.533333
Maycocks	P1	M1	4	SSID	17	0	0	91	17	1
Maycocks	P1	M1	5	DSTR	3	9	0	92	12	0.25
Maycocks	P1	M1	5	ORBI	15	1	0	92	16	0.9375
Maycocks	P1	M1	5	MCAV	9	15	0	92	24	0.375
Maycocks	P1	M1	5	PAST	9	13	0	92	22	0.409091
Maycocks	P1	M1	5	SSID	5	0	0	92	5	1
Maycocks	P1	M2	1	DSTR	0	5	0	93	5	0
Maycocks	P1	M2	1	ORBI	9	29	0	93	38	0.236842
Maycocks	P1	M2	1	MCAV	2	19	0	93	21	0.0952381
Maycocks	P1	M2	1	PAST	2	63	0	93	65	0.0307692
Maycocks	P1	M2	1	SSID	0	8	0	93	8	0
Maycocks	P1	M2	2	DSTR	0	6	0	94	6	0
Maycocks	P1	M2	2	ORBI	5	22	0	94	27	0.185185
Maycocks	P1	M2	2	MCAV	0	25	0	94	25	0
Maycocks	P1	M2	2	PAST	0	67	0	94	67	0
Maycocks	P1	M2	2	SSID	2	5	0	94	7	0.285714
Maycocks	P1	M2	3	DSTR	1	4	0	95	5	0.2
Maycocks	P1	M2	3	ORBI	12	18	0	95	30	0.4
Maycocks	P1	M2	3	MCAV	1	23	0	95	24	0.0416667
Maycocks	P1	M2	3	PAST	0	21	0	95	21	0
Maycocks	P1	M2	3	SSID	0	4	0	95	4	0
Maycocks	P1	M2	4	DSTR	0	7	1	96	7	0
Maycocks	P1	M2	4	ORBI	0	10	0	96	10	0
Maycocks	P1	M2	4	MCAV	0	26	0	96	26	0
Maycocks	P1	M2	4	PAST	0	23	0	96	23	0
Maycocks	P1	M2	4	SSID	0	10	0	96	10	0
Maycocks	P1	M2	5	DSTR	0	3	0	97	3	0
Maycocks	P1	M2	5	ORBI	0	13	0	97	13	0
Maycocks	P1	M2	5	MCAV	0	16	0	97	16	0
Maycocks	P1	M2	5	PAST	0	15	0	97	15	0
Maycocks	P1	M2	5	SSID	0	4	0	97	4	0
Maycocks	P1	M3	1	DSTR	0	13	1	98	13	0
Maycocks	P1	M3	1	ORBI	0	28	2	98	28	0
Maycocks	P1	M3	1	MCAV	0	33	1	98	33	0
Maycocks	P1	M3	1	PAST	0	76	0	98	76	0
Maycocks	P1	M3	1	SSID	0	25	0	98	25	0
Maycocks	P1	M3	2	DSTR	1	8	0	99	9	0.111111
Maycocks	P1	M3	2	ORBI	5	17	4	99	22	0.227273
Maycocks	P1	M3	2	MCAV	1	28	0	99	29	0.0344828
Maycocks	P1	M3	2	PAST	0	48	0	99	48	0
Maycocks	P1	M3	2	SSID	2	10	0	99	12	0.166667
Maycocks	P1	M3	3	DSTR	0	4	0	100	4	0
Maycocks	P1	M3	3	ORBI	0	34	21	100	34	0
Maycocks	P1	M3	3	MCAV	0	16	0	100	16	0
Maycocks	P1	M3	3	PAST	0	14	0	100	14	0
Maycocks	P1	M3	3	SSID	0	3	0	100	3	0
Maycocks	P1	M3	5	DSTR	0	6	0	101	6	0
Maycocks	P1	M3	5	ORBI	0	28	0	101	28	0
Maycocks	P1	M3	5	MCAV	0	31	0	101	31	0
Maycocks	P1	M3	5	PAST	0	51	0	101	51	0
Maycocks	P1	M3	5	SSID	0	4	0	101	4	0
Maycocks	P2	M1	3	DSTR	0	8	0	102	8	0
Maycocks	P2	M1	3	ORBI	15	10	0	102	25	0.6
Maycocks	P2	M1	3	MCAV	2	21	0	102	23	0.0869565
Maycocks	P2	M1	3	PAST	0	43	0	102	43	0
Maycocks	P2	M1	3	SSID	2	4	0	102	6	0.333333
Maycocks	P2	M1	4	DSTR	1	10	0	103	11	0.0909091
Maycocks	P2	M1	4	ORBI	4	19	0	103	23	0.173913
Maycocks	P2	M1	4	MCAV	0	23	0	103	23	0
Maycocks	P2	M1	4	PAST	0	44	0	103	44	0
Maycocks	P2	M1	4	SSID	1	12	1	103	13	0.0769231
Maycocks	P2	M1	5	DSTR	0	9	0	104	9	0
Maycocks	P2	M1	5	ORBI	4	10	0	104	14	0.285714
Maycocks	P2	M1	5	MCAV	1	25	0	104	26	0.0384615
Maycocks	P2	M1	5	PAST	0	41	0	104	41	0
Maycocks	P2	M1	5	SSID	2	5	0	104	7	0.285714
Maycocks	P2	M1	8	DSTR	0	13	0	105	13	0
Maycocks	P2	M1	8	ORBI	4	10	0	105	14	0.285714
Maycocks	P2	M1	8	MCAV	1	23	0	105	24	0.0416667
Maycocks	P2	M1	8	PAST	0	49	0	105	49	0
Maycocks	P2	M1	8	SSID	2	5	0	105	7	0.285714
Maycocks	P2	M1	10	DSTR	0	6	0	106	6	0
Maycocks	P2	M1	10	ORBI	4	6	0	106	10	0.4
Maycocks	P2	M1	10	MCAV	1	31	0	106	32	0.03125
Maycocks	P2	M1	10	PAST	1	91	1	106	92	0.0108696
Maycocks	P2	M1	10	SSID	1	12	0	106	13	0.0769231
Maycocks	P2	M2	32	DSTR	0	7	0	107	7	0
Maycocks	P2	M2	32	ORBI	0	16	0	107	16	0
Maycocks	P2	M2	32	MCAV	0	18	0	107	18	0
Maycocks	P2	M2	32	PAST	0	50	0	107	50	0
Maycocks	P2	M2	32	SSID	0	9	0	107	9	0
Maycocks	P2	M2	33	DSTR	0	6	0	108	6	0
Maycocks	P2	M2	33	ORBI	0	7	0	108	7	0
Maycocks	P2	M2	33	MCAV	0	34	0	108	34	0
Maycocks	P2	M2	33	PAST	0	42	0	108	42	0
Maycocks	P2	M2	33	SSID	0	4	0	108	4	0
Maycocks	P2	M2	34	DSTR	0	5	0	109	5	0
Maycocks	P2	M2	34	ORBI	1	13	0	109	14	0.0714286
Maycocks	P2	M2	34	MCAV	0	13	0	109	13	0
Maycocks	P2	M2	34	PAST	2	41	0	109	43	0.0465116
Maycocks	P2	M2	34	SSID	0	8	0	109	8	0
Maycocks	P2	M2	35	DSTR	0	9	0	110	9	0
Maycocks	P2	M2	35	ORBI	0	12	0	110	12	0
Maycocks	P2	M2	35	MCAV	0	16	0	110	16	0
Maycocks	P2	M2	35	PAST	0	29	0	110	29	0
Maycocks	P2	M2	35	SSID	0	7	0	110	7	0
Maycocks	P2	M2	36	DSTR	0	5	0	111	5	0
Maycocks	P2	M2	36	ORBI	0	17	0	111	17	0
Maycocks	P2	M2	36	MCAV	0	18	0	111	18	0
Maycocks	P2	M2	36	PAST	0	45	0	111	45	0
Maycocks	P2	M2	36	SSID	0	5	0	111	5	0
Maycocks	P2	M3	68	DSTR	0	8	0	112	8	0
Maycocks	P2	M3	68	ORBI	0	21	0	112	21	0
Maycocks	P2	M3	68	MCAV	0	27	0	112	27	0
Maycocks	P2	M3	68	PAST	0	71	0	112	71	0
Maycocks	P2	M3	68	SSID	0	11	0	112	11	0
Maycocks	P2	M3	69	DSTR	0	7	0	113	7	0
Maycocks	P2	M3	69	ORBI	0	18	0	113	18	0
Maycocks	P2	M3	69	MCAV	0	21	0	113	21	0
Maycocks	P2	M3	69	PAST	0	99	0	113	99	0
Maycocks	P2	M3	69	SSID	1	10	0	113	11	0.0909091
Maycocks	P2	M3	70	DSTR	0	9	0	114	9	0
Maycocks	P2	M3	70	ORBI	0	18	0	114	18	0
Maycocks	P2	M3	70	MCAV	0	27	0	114	27	0
Maycocks	P2	M3	70	PAST	0	48	0	114	48	0
Maycocks	P2	M3	70	SSID	1	10	0	114	11	0.0909091
Maycocks	P2	M3	71	DSTR	0	6	0	115	6	0
Maycocks	P2	M3	71	ORBI	0	43	1	115	43	0
Maycocks	P2	M3	71	MCAV	0	34	0	115	34	0
Maycocks	P2	M3	71	PAST	0	80	0	115	80	0
Maycocks	P2	M3	71	SSID	0	13	0	115	13	0
Maycocks	P2	M3	72	DSTR	1	12	0	116	13	0.0769231
Maycocks	P2	M3	72	ORBI	1	13	0	116	14	0.0714286
Maycocks	P2	M3	72	MCAV	0	17	0	116	17	0
Maycocks	P2	M3	72	PAST	0	40	0	116	40	0
Maycocks	P2	M3	72	SSID	0	5	0	116	5	0
North Bellairs	P1	M1	1	DSTR	1	0	0	117	1	1
North Bellairs	P1	M1	1	ORBI	8	0	0	117	8	1
North Bellairs	P1	M1	1	PAST	54	39	0	117	93	0.580645
North Bellairs	P1	M1	1	SSID	0	9	0	117	9	0
North Bellairs	P1	M1	2	ORBI	1	0	0	118	1	1
North Bellairs	P1	M1	2	PAST	56	17	0	118	73	0.767123
North Bellairs	P1	M1	2	SSID	3	5	0	118	8	0.375
North Bellairs	P1	M1	3	DSTR	1	0	0	119	1	1
North Bellairs	P1	M1	3	ORBI	7	0	0	119	7	1
North Bellairs	P1	M1	3	PAST	99	9	0	119	108	0.916667
North Bellairs	P1	M1	3	SSID	0	1	0	119	1	0
North Bellairs	P1	M1	4	ORBI	18	3	0	120	21	0.857143
North Bellairs	P1	M1	4	PAST	14	25	0	120	39	0.358974
North Bellairs	P1	M1	4	SSID	14	5	0	120	19	0.736842
North Bellairs	P1	M1	5	DSTR	0	1	0	121	1	0
North Bellairs	P1	M1	5	ORBI	22	3	0	121	25	0.88
North Bellairs	P1	M1	5	PAST	9	36	0	121	45	0.2
North Bellairs	P1	M1	5	SSID	0	19	0	121	19	0
North Bellairs	P1	M2	1	DSTR	0	5	0	122	5	0
North Bellairs	P1	M2	1	PAST	1	92	0	122	93	0.0107527
North Bellairs	P1	M2	1	SSID	1	2	0	122	3	0.333333
North Bellairs	P1	M2	2	DSTR	0	1	0	123	1	0
North Bellairs	P1	M2	2	ORBI	1	17	0	123	18	0.0555556
North Bellairs	P1	M2	2	MCAV	0	1	0	123	1	0
North Bellairs	P1	M2	2	PAST	1	105	0	123	106	0.00943396
North Bellairs	P1	M2	2	SSID	0	3	0	123	3	0
North Bellairs	P1	M2	3	ORBI	2	3	0	124	5	0.4
North Bellairs	P1	M2	3	PAST	1	32	1	124	33	0.030303
North Bellairs	P1	M2	3	SSID	0	1	0	124	1	0
North Bellairs	P1	M2	4	ORBI	0	4	0	125	4	0
North Bellairs	P1	M2	4	PAST	1	16	0	125	17	0.0588235
North Bellairs	P1	M2	4	SSID	0	6	0	125	6	0
North Bellairs	P1	M2	5	ORBI	0	5	0	126	5	0
North Bellairs	P1	M2	5	PAST	0	8	0	126	8	0
North Bellairs	P1	M2	5	SSID	0	3	0	126	3	0
North Bellairs	P1	M3	1	DSTR	0	9	0	127	9	0
North Bellairs	P1	M3	1	ORBI	0	11	0	127	11	0
North Bellairs	P1	M3	1	PAST	0	173	0	127	173	0
North Bellairs	P1	M3	1	SSID	0	4	0	127	4	0
North Bellairs	P1	M3	2	DSTR	0	1	0	128	1	0
North Bellairs	P1	M3	2	ORBI	0	3	1	128	3	0
North Bellairs	P1	M3	2	PAST	0	124	2	128	124	0
North Bellairs	P1	M3	2	SSID	0	1	0	128	1	0
North Bellairs	P1	M3	3	ORBI	0	1	0	129	1	0
North Bellairs	P1	M3	3	PAST	0	53	0	129	53	0
North Bellairs	P1	M3	3	SSID	0	1	0	129	1	0
North Bellairs	P1	M3	5	DSTR	0	1	0	130	1	0
North Bellairs	P1	M3	5	ORBI	0	0	8	130	0	NA
North Bellairs	P1	M3	5	PAST	0	160	4	130	160	0
North Bellairs	P2	M1	27	DSTR	0	2	0	131	2	0
North Bellairs	P2	M1	27	ORBI	0	6	0	131	6	0
North Bellairs	P2	M1	27	PAST	0	22	1	131	22	0
North Bellairs	P2	M1	27	SSID	0	6	0	131	6	0
North Bellairs	P2	M1	28	DSTR	0	2	0	132	2	0
North Bellairs	P2	M1	28	ORBI	1	19	0	132	20	0.05
North Bellairs	P2	M1	28	PAST	0	86	1	132	86	0
North Bellairs	P2	M1	28	SSID	0	7	0	132	7	0
North Bellairs	P2	M1	29	ORBI	7	17	0	133	24	0.291667
North Bellairs	P2	M1	29	MCAV	1	3	0	133	4	0.25
North Bellairs	P2	M1	29	PAST	1	82	0	133	83	0.0120482
North Bellairs	P2	M1	29	SSID	0	8	0	133	8	0
North Bellairs	P2	M1	30	DSTR	0	2	0	134	2	0
North Bellairs	P2	M1	30	ORBI	0	2	0	134	2	0
North Bellairs	P2	M1	30	PAST	0	108	5	134	108	0
North Bellairs	P2	M1	31	DSTR	1	5	0	135	6	0.166667
North Bellairs	P2	M1	31	ORBI	0	5	0	135	5	0
North Bellairs	P2	M1	31	MCAV	0	4	0	135	4	0
North Bellairs	P2	M1	31	PAST	2	61	0	135	63	0.031746
North Bellairs	P2	M1	31	SSID	0	2	0	135	2	0
North Bellairs	P2	M2	50	DSTR	0	3	0	136	3	0
North Bellairs	P2	M2	50	MCAV	0	1	0	136	1	0
North Bellairs	P2	M2	50	PAST	0	93	0	136	93	0
North Bellairs	P2	M2	50	SSID	0	3	0	136	3	0
North Bellairs	P2	M2	51	ORBI	0	8	0	137	8	0
North Bellairs	P2	M2	51	PAST	0	63	0	137	63	0
North Bellairs	P2	M2	51	SSID	0	2	0	137	2	0
North Bellairs	P2	M2	52	DSTR	0	1	0	138	1	0
North Bellairs	P2	M2	52	ORBI	0	1	0	138	1	0
North Bellairs	P2	M2	52	PAST	0	139	0	138	139	0
North Bellairs	P2	M2	52	SSID	0	4	0	138	4	0
North Bellairs	P2	M2	60	DSTR	0	1	0	139	1	0
North Bellairs	P2	M2	60	ORBI	0	12	0	139	12	0
North Bellairs	P2	M2	60	PAST	0	126	0	139	126	0
North Bellairs	P2	M2	60	SSID	0	11	0	139	11	0
North Bellairs	P2	M2	61	ORBI	0	16	0	140	16	0
North Bellairs	P2	M2	61	PAST	0	83	0	140	83	0
North Bellairs	P2	M3	83	ORBI	0	21	0	141	21	0
North Bellairs	P2	M3	83	MCAV	0	2	0	141	2	0
North Bellairs	P2	M3	83	PAST	0	70	0	141	70	0
North Bellairs	P2	M3	83	SSID	0	3	0	141	3	0
North Bellairs	P2	M3	84	DSTR	0	3	0	142	3	0
North Bellairs	P2	M3	84	ORBI	0	5	0	142	5	0
North Bellairs	P2	M3	84	PAST	0	109	0	142	109	0
North Bellairs	P2	M3	84	SSID	0	3	0	142	3	0
North Bellairs	P2	M3	85	ORBI	0	24	0	143	24	0
North Bellairs	P2	M3	85	PAST	1	118	0	143	119	0.00840336
North Bellairs	P2	M3	85	SSID	0	6	0	143	6	0
North Bellairs	P2	M3	86	ORBI	0	1	0	144	1	0
North Bellairs	P2	M3	86	PAST	0	89	1	144	89	0
North Bellairs	P2	M3	87	DSTR	0	8	0	145	8	0
North Bellairs	P2	M3	87	ORBI	0	5	0	145	5	0
North Bellairs	P2	M3	87	PAST	0	43	1	145	43	0
North Bellairs	P2	M3	87	SSID	0	5	0	145	5	0
Welcome Inn	P1	M1	1	DSTR	5	1	0	146	6	0.833333
Welcome Inn	P1	M1	1	ORBI	7	1	0	146	8	0.875
Welcome Inn	P1	M1	1	MCAV	40	0	0	146	40	1
Welcome Inn	P1	M1	1	PAST	27	17	0	146	44	0.613636
Welcome Inn	P1	M1	1	SSID	22	4	0	146	26	0.846154
Welcome Inn	P1	M1	2	DSTR	1	0	0	147	1	1
Welcome Inn	P1	M1	2	ORBI	3	4	0	147	7	0.428571
Welcome Inn	P1	M1	2	PAST	15	13	0	147	28	0.535714
Welcome Inn	P1	M1	2	SSID	14	11	0	147	25	0.56
Welcome Inn	P1	M1	3	DSTR	2	2	0	148	4	0.5
Welcome Inn	P1	M1	3	ORBI	5	4	0	148	9	0.555556
Welcome Inn	P1	M1	3	MCAV	16	7	0	148	23	0.695652
Welcome Inn	P1	M1	3	PAST	3	12	0	148	15	0.2
Welcome Inn	P1	M1	3	SSID	11	8	0	148	19	0.578947
Welcome Inn	P1	M1	4	ORBI	7	1	0	149	8	0.875
Welcome Inn	P1	M1	4	MCAV	40	0	0	149	40	1
Welcome Inn	P1	M1	4	PAST	26	18	0	149	44	0.590909
Welcome Inn	P1	M1	4	SSID	22	4	0	149	26	0.846154
Welcome Inn	P1	M1	5	ORBI	3	4	0	150	7	0.428571
Welcome Inn	P1	M1	5	PAST	15	13	0	150	28	0.535714
Welcome Inn	P1	M2	5	SSID	14	11	0	150	25	0.56
Welcome Inn	P1	M2	1	DSTR	1	0	0	151	1	1
Welcome Inn	P1	M2	1	ORBI	1	5	0	151	6	0.166667
Welcome Inn	P1	M2	1	MCAV	2	19	0	151	21	0.0952381
Welcome Inn	P1	M2	1	PAST	0	14	0	151	14	0
Welcome Inn	P1	M2	1	SSID	0	7	0	151	7	0
Welcome Inn	P1	M2	2	DSTR	0	11	0	152	11	0
Welcome Inn	P1	M2	2	ORBI	0	2	0	152	2	0
Welcome Inn	P1	M2	2	MCAV	0	30	0	152	30	0
Welcome Inn	P1	M2	2	PAST	0	19	0	152	19	0
Welcome Inn	P1	M2	2	SSID	0	18	0	152	18	0
Welcome Inn	P1	M2	3	DSTR	1	3	0	153	4	0.25
Welcome Inn	P1	M2	3	ORBI	0	5	0	153	5	0
Welcome Inn	P1	M2	3	MCAV	1	19	0	153	20	0.05
Welcome Inn	P1	M2	3	PAST	0	8	0	153	8	0
Welcome Inn	P1	M2	3	SSID	4	9	0	153	13	0.307692
Welcome Inn	P1	M2	4	DSTR	1	11	0	154	12	0.0833333
Welcome Inn	P1	M2	4	MCAV	0	17	0	154	17	0
Welcome Inn	P1	M2	4	PAST	0	13	0	154	13	0
Welcome Inn	P1	M2	4	SSID	0	13	1	154	13	0
Welcome Inn	P1	M2	5	DSTR	0	29	1	155	29	0
Welcome Inn	P1	M2	5	ORBI	0	3	0	155	3	0
Welcome Inn	P1	M2	5	MCAV	0	9	0	155	9	0
Welcome Inn	P1	M2	5	PAST	0	66	0	155	66	0
Welcome Inn	P1	M2	5	SSID	0	20	0	155	20	0
Welcome Inn	P1	M3	1	DSTR	1	22	0	156	23	0.0434783
Welcome Inn	P1	M3	1	ORBI	0	7	0	156	7	0
Welcome Inn	P1	M3	1	MCAV	0	46	1	156	46	0
Welcome Inn	P1	M3	1	PAST	0	43	4	156	43	0
Welcome Inn	P1	M3	1	SSID	2	50	1	156	52	0.0384615
Welcome Inn	P1	M3	2	DSTR	0	2	0	157	2	0
Welcome Inn	P1	M3	2	ORBI	1	6	0	157	7	0.142857
Welcome Inn	P1	M3	2	MCAV	0	22	0	157	22	0
Welcome Inn	P1	M3	2	PAST	0	24	0	157	24	0
Welcome Inn	P1	M3	2	SSID	0	12	0	157	12	0
Welcome Inn	P1	M3	3	DSTR	0	7	0	158	7	0
Welcome Inn	P1	M3	3	ORBI	0	7	0	158	7	0
Welcome Inn	P1	M3	3	MCAV	1	27	3	158	28	0.0357143
Welcome Inn	P1	M3	3	PAST	0	12	0	158	12	0
Welcome Inn	P1	M3	3	SSID	1	22	4	158	23	0.0434783
Welcome Inn	P1	M3	5	DSTR	0	2	0	159	2	0
Welcome Inn	P1	M3	5	ORBI	0	5	0	159	5	0
Welcome Inn	P1	M3	5	MCAV	0	38	0	159	38	0
Welcome Inn	P1	M3	5	PAST	0	34	0	159	34	0
Welcome Inn	P1	M3	5	SSID	0	19	0	159	19	0
Welcome Inn	P2	M1	22	DSTR	0	18	0	160	18	0
Welcome Inn	P2	M1	22	ORBI	2	15	0	160	17	0.117647
Welcome Inn	P2	M1	22	MCAV	0	44	0	160	44	0
Welcome Inn	P2	M1	22	PAST	0	45	1	160	45	0
Welcome Inn	P2	M1	22	SSID	1	48	0	160	49	0.0204082
Welcome Inn	P2	M1	23	DSTR	0	21	0	161	21	0
Welcome Inn	P2	M1	23	ORBI	0	8	0	161	8	0
Welcome Inn	P2	M1	23	MCAV	9	41	0	161	50	0.18
Welcome Inn	P2	M1	23	PAST	0	37	0	161	37	0
Welcome Inn	P2	M1	23	SSID	8	31	3	161	39	0.205128
Welcome Inn	P2	M1	24	DSTR	0	19	0	162	19	0
Welcome Inn	P2	M1	24	ORBI	0	7	0	162	7	0
Welcome Inn	P2	M1	24	MCAV	0	22	0	162	22	0
Welcome Inn	P2	M1	24	PAST	0	40	0	162	40	0
Welcome Inn	P2	M1	24	SSID	2	26	0	162	28	0.0714286
Welcome Inn	P2	M1	25	DSTR	0	20	0	163	20	0
Welcome Inn	P2	M1	25	ORBI	0	4	0	163	4	0
Welcome Inn	P2	M1	25	MCAV	0	28	0	163	28	0
Welcome Inn	P2	M1	25	PAST	0	54	0	163	54	0
Welcome Inn	P2	M1	25	SSID	2	35	0	163	37	0.0540541
Welcome Inn	P2	M1	26	DSTR	0	20	0	164	20	0
Welcome Inn	P2	M1	26	ORBI	0	4	0	164	4	0
Welcome Inn	P2	M1	26	MCAV	6	49	0	164	55	0.109091
Welcome Inn	P2	M1	26	PAST	0	52	0	164	52	0
Welcome Inn	P2	M1	26	SSID	1	24	0	164	25	0.04
Welcome Inn	P2	M2	40	DSTR	0	9	0	165	9	0
Welcome Inn	P2	M2	40	ORBI	0	6	0	165	6	0
Welcome Inn	P2	M2	40	MCAV	0	43	0	165	43	0
Welcome Inn	P2	M2	40	PAST	0	21	0	165	21	0
Welcome Inn	P2	M2	40	SSID	0	12	0	165	12	0
Welcome Inn	P2	M2	41	DSTR	0	9	0	166	9	0
Welcome Inn	P2	M2	41	ORBI	0	8	0	166	8	0
Welcome Inn	P2	M2	41	MCAV	0	24	1	166	24	0
Welcome Inn	P2	M2	41	PAST	0	18	0	166	18	0
Welcome Inn	P2	M2	41	SSID	0	35	0	166	35	0
Welcome Inn	P2	M2	42	DSTR	0	9	0	167	9	0
Welcome Inn	P2	M2	42	ORBI	0	10	0	167	10	0
Welcome Inn	P2	M2	42	MCAV	0	41	0	167	41	0
Welcome Inn	P2	M2	42	PAST	0	18	0	167	18	0
Welcome Inn	P2	M2	42	SSID	0	39	0	167	39	0
Welcome Inn	P2	M2	43	DSTR	1	4	0	168	5	0.2
Welcome Inn	P2	M2	43	ORBI	0	5	0	168	5	0
Welcome Inn	P2	M2	43	MCAV	0	43	0	168	43	0
Welcome Inn	P2	M2	43	PAST	0	16	0	168	16	0
Welcome Inn	P2	M2	43	SSID	0	20	0	168	20	0
Welcome Inn	P2	M2	44	DSTR	0	3	0	169	3	0
Welcome Inn	P2	M2	44	ORBI	0	5	0	169	5	0
Welcome Inn	P2	M2	44	MCAV	1	29	0	169	30	0.0333333
Welcome Inn	P2	M2	44	PAST	0	25	0	169	25	0
Welcome Inn	P2	M2	44	SSID	0	9	0	169	9	0
Welcome Inn	P2	M3	63	DSTR	0	7	0	170	7	0
Welcome Inn	P2	M3	63	ORBI	0	8	0	170	8	0
Welcome Inn	P2	M3	63	MCAV	0	38	0	170	38	0
Welcome Inn	P2	M3	63	PAST	0	37	0	170	37	0
Welcome Inn	P2	M3	63	SSID	1	18	0	170	19	0.0526316
Welcome Inn	P2	M3	64	DSTR	1	5	0	171	6	0.166667
Welcome Inn	P2	M3	64	ORBI	0	11	0	171	11	0
Welcome Inn	P2	M3	64	MCAV	0	54	1	171	54	0
Welcome Inn	P2	M3	64	PAST	0	35	0	171	35	0
Welcome Inn	P2	M3	64	SSID	0	36	0	171	36	0
Welcome Inn	P2	M3	65	DSTR	0	12	0	172	12	0
Welcome Inn	P2	M3	65	ORBI	0	12	0	172	12	0
Welcome Inn	P2	M3	65	MCAV	0	44	0	172	44	0
Welcome Inn	P2	M3	65	PAST	0	36	0	172	36	0
Welcome Inn	P2	M3	65	SSID	2	31	0	172	33	0.0606061
Welcome Inn	P2	M3	66	DSTR	0	4	0	173	4	0
Welcome Inn	P2	M3	66	ORBI	0	9	0	173	9	0
Welcome Inn	P2	M3	66	MCAV	0	38	0	173	38	0
Welcome Inn	P2	M3	66	PAST	0	15	0	173	15	0
Welcome Inn	P2	M3	66	SSID	0	17	0	173	17	0
Welcome Inn	P2	M3	67	DSTR	0	17	0	174	17	0
Welcome Inn	P2	M3	67	ORBI	0	7	0	174	7	0
Welcome Inn	P2	M3	67	MCAV	0	26	0	174	26	0
Welcome Inn	P2	M3	67	PAST	0	13	0	174	13	0
Welcome Inn	P2	M3	67	SSID	2	24	0	174	26	0.0769231
										541
										0.68481

## Sheet: Mortality -Feb and June periods
Period	Month	Reef name	SpeCorr	Transect	No. colonies	Recently dead %
P1	M2	Atlantis	DSTR	1	3	0
P1	M2	Atlantis	DSTR	2	6	0.333333
P1	M2	Atlantis	DSTR	3	5	0.4
P1	M2	Atlantis	DSTR	4	4	0
P1	M2	Atlantis	DSTR	5	6	0
P1	M2	Atlantis	ORBI	1	31	1.45161
P1	M2	Atlantis	ORBI	2	25	4.72
P1	M2	Atlantis	ORBI	3	14	0.714286
P1	M2	Atlantis	ORBI	4	15	2.33333
P1	M2	Atlantis	ORBI	5	18	15.8333
P1	M2	Atlantis	MCAV	1	20	0.5
P1	M2	Atlantis	MCAV	2	28	0.5
P1	M2	Atlantis	MCAV	3	39	0.615385
P1	M2	Atlantis	MCAV	4	16	0
P1	M2	Atlantis	MCAV	5	22	4.54545
P1	M2	Atlantis	PAST	1	31	0.483871
P1	M2	Atlantis	PAST	2	20	0.25
P1	M2	Atlantis	PAST	3	20	11.25
P1	M2	Atlantis	PAST	4	15	0
P1	M2	Atlantis	PAST	5	12	0
P1	M2	Atlantis	SSID	1	10	3
P1	M2	Atlantis	SSID	2	15	0.466667
P1	M2	Atlantis	SSID	3	19	3.15789
P1	M2	Atlantis	SSID	4	16	5
P1	M2	Atlantis	SSID	5	11	2.72727
P1	M2	Batts Rock	DSTR	1	1	0
P1	M2	Batts Rock	DSTR	2	2	7.5
P1	M2	Batts Rock	DSTR	3	2	0
P1	M2	Batts Rock	DSTR	4	1	0
P1	M2	Batts Rock	DSTR	5	2	0
P1	M2	Batts Rock	ORBI	1	340	1.08824
P1	M2	Batts Rock	ORBI	2	113	2.62832
P1	M2	Batts Rock	ORBI	3	50	0.14
P1	M2	Batts Rock	ORBI	4	30	0
P1	M2	Batts Rock	ORBI	5	54	0.185185
P1	M2	Batts Rock	MCAV	1	7	4.28571
P1	M2	Batts Rock	MCAV	2	3	3.33333
P1	M2	Batts Rock	MCAV	3	2	0
P1	M2	Batts Rock	MCAV	4	1	0
P1	M2	Batts Rock	MCAV	5	2	0
P1	M2	Batts Rock	PAST	1	26	8.07692
P1	M2	Batts Rock	PAST	2	12	1.66667
P1	M2	Batts Rock	PAST	3	5	0
P1	M2	Batts Rock	PAST	4	10	0
P1	M2	Batts Rock	PAST	5	4	0
P1	M2	Batts Rock	SSID	1	8	6.25
P1	M2	Batts Rock	SSID	2	4	0
P1	M2	Batts Rock	SSID	3	4	0
P1	M2	Batts Rock	SSID	4	2	0
P1	M2	Batts Rock	SSID	5	2	0
P1	M2	Coconut Court	DSTR	1	20	0.5
P1	M2	Coconut Court	DSTR	2	47	3.7234
P1	M2	Coconut Court	DSTR	3	35	1.48571
P1	M2	Coconut Court	DSTR	4	58	0.0862069
P1	M2	Coconut Court	DSTR	5	28	0
P1	M2	Coconut Court	ORBI	2	1	10
P1	M2	Coconut Court	ORBI	4	1	0
P1	M2	Coconut Court	MCAV	1	6	0
P1	M2	Coconut Court	MCAV	2	6	0
P1	M2	Coconut Court	MCAV	3	8	0
P1	M2	Coconut Court	MCAV	4	8	0
P1	M2	Coconut Court	MCAV	5	8	0
P1	M2	Coconut Court	PAST	1	37	0.27027
P1	M2	Coconut Court	PAST	2	40	3.5
P1	M2	Coconut Court	PAST	3	18	0
P1	M2	Coconut Court	PAST	4	16	0
P1	M2	Coconut Court	PAST	5	18	0
P1	M2	Coconut Court	SSID	1	2	5
P1	M2	Coconut Court	SSID	2	5	0
P1	M2	Coconut Court	SSID	3	10	0
P1	M2	Coconut Court	SSID	4	6	0
P1	M2	Coconut Court	SSID	5	3	0
P1	M2	Maycocks	DSTR	1	5	3
P1	M2	Maycocks	DSTR	2	6	0.833333
P1	M2	Maycocks	DSTR	3	5	12.4
P1	M2	Maycocks	DSTR	4	8	12.5
P1	M2	Maycocks	DSTR	5	3	0
P1	M2	Maycocks	ORBI	1	38	6.05263
P1	M2	Maycocks	ORBI	2	27	9.88889
P1	M2	Maycocks	ORBI	3	30	0
P1	M2	Maycocks	ORBI	4	10	0
P1	M2	Maycocks	ORBI	5	13	0
P1	M2	Maycocks	MCAV	1	21	1.66667
P1	M2	Maycocks	MCAV	2	25	0
P1	M2	Maycocks	MCAV	3	24	0
P1	M2	Maycocks	MCAV	4	26	0
P1	M2	Maycocks	MCAV	5	16	0
P1	M2	Maycocks	PAST	1	65	1.15385
P1	M2	Maycocks	PAST	2	67	6.04478
P1	M2	Maycocks	PAST	3	21	0.333333
P1	M2	Maycocks	PAST	4	23	0
P1	M2	Maycocks	PAST	5	15	0
P1	M2	Maycocks	SSID	1	8	1.875
P1	M2	Maycocks	SSID	2	7	5.71429
P1	M2	Maycocks	SSID	3	4	2.5
P1	M2	Maycocks	SSID	4	10	0
P1	M2	Maycocks	SSID	5	4	0
P1	M2	North Bellairs	DSTR	1	5	10
P1	M2	North Bellairs	DSTR	2	1	0
P1	M2	North Bellairs	ORBI	2	18	7.61111
P1	M2	North Bellairs	ORBI	3	5	1
P1	M2	North Bellairs	ORBI	4	4	0
P1	M2	North Bellairs	ORBI	5	5	0
P1	M2	North Bellairs	MCAV	2	1	30
P1	M2	North Bellairs	PAST	1	93	6.07527
P1	M2	North Bellairs	PAST	2	106	3.90566
P1	M2	North Bellairs	PAST	3	34	7.35294
P1	M2	North Bellairs	PAST	4	17	0
P1	M2	North Bellairs	PAST	5	8	0
P1	M2	North Bellairs	SSID	1	3	3.33333
P1	M2	North Bellairs	SSID	2	3	6.66667
P1	M2	North Bellairs	SSID	3	1	0
P1	M2	North Bellairs	SSID	4	6	0
P1	M2	North Bellairs	SSID	5	3	0
P1	M2	Welcome Inn	DSTR	1	1	5
P1	M2	Welcome Inn	DSTR	2	11	1.81818
P1	M2	Welcome Inn	DSTR	3	4	0
P1	M2	Welcome Inn	DSTR	4	12	0
P1	M2	Welcome Inn	DSTR	5	30	5.66667
P1	M2	Welcome Inn	ORBI	1	6	0.833333
P1	M2	Welcome Inn	ORBI	2	2	7.5
P1	M2	Welcome Inn	ORBI	3	5	1
P1	M2	Welcome Inn	ORBI	5	3	0
P1	M2	Welcome Inn	MCAV	1	21	2.14286
P1	M2	Welcome Inn	MCAV	2	30	2.06667
P1	M2	Welcome Inn	MCAV	3	20	3.6
P1	M2	Welcome Inn	MCAV	4	17	0.294118
P1	M2	Welcome Inn	MCAV	5	9	0.555556
P1	M2	Welcome Inn	PAST	1	14	0.714286
P1	M2	Welcome Inn	PAST	2	19	4.26316
P1	M2	Welcome Inn	PAST	3	8	0
P1	M2	Welcome Inn	PAST	4	13	0
P1	M2	Welcome Inn	PAST	5	66	0
P1	M2	Welcome Inn	SSID	1	7	1.42857
P1	M2	Welcome Inn	SSID	2	18	1.27778
P1	M2	Welcome Inn	SSID	3	13	0.923077
P1	M2	Welcome Inn	SSID	4	14	8.57143
P1	M2	Welcome Inn	SSID	5	20	3.25
P1	M3	Atlantis	DSTR	1	15	4.33333
P1	M3	Atlantis	DSTR	2	9	13.3333
P1	M3	Atlantis	DSTR	3	8	39.375
P1	M3	Atlantis	DSTR	5	10	10
P1	M3	Atlantis	ORBI	1	46	40.1087
P1	M3	Atlantis	ORBI	2	45	32.4889
P1	M3	Atlantis	ORBI	3	24	44.5833
P1	M3	Atlantis	ORBI	5	44	26.0227
P1	M3	Atlantis	MCAV	1	32	11
P1	M3	Atlantis	MCAV	2	27	7.85185
P1	M3	Atlantis	MCAV	3	24	40.625
P1	M3	Atlantis	MCAV	5	53	9.33962
P1	M3	Atlantis	PAST	1	63	4.79365
P1	M3	Atlantis	PAST	2	40	5.4
P1	M3	Atlantis	PAST	3	27	9.07407
P1	M3	Atlantis	PAST	5	58	0.258621
P1	M3	Atlantis	SSID	1	36	18.25
P1	M3	Atlantis	SSID	2	16	10.9375
P1	M3	Atlantis	SSID	3	15	57.6667
P1	M3	Atlantis	SSID	5	13	11.9231
P1	M3	Batts Rock	DSTR	1	11	8.18182
P1	M3	Batts Rock	DSTR	2	16	5.125
P1	M3	Batts Rock	DSTR	3	7	1.42857
P1	M3	Batts Rock	DSTR	5	4	28.75
P1	M3	Batts Rock	ORBI	1	116	23
P1	M3	Batts Rock	ORBI	2	52	14.6154
P1	M3	Batts Rock	ORBI	3	315	35.1746
P1	M3	Batts Rock	ORBI	5	134	25.7463
P1	M3	Batts Rock	MCAV	1	3	0
P1	M3	Batts Rock	MCAV	5	3	5
P1	M3	Batts Rock	PAST	1	60	4.41667
P1	M3	Batts Rock	PAST	2	47	8.34043
P1	M3	Batts Rock	PAST	3	25	10.4
P1	M3	Batts Rock	PAST	5	25	5.4
P1	M3	Batts Rock	SSID	1	15	15.6667
P1	M3	Batts Rock	SSID	2	9	12.2222
P1	M3	Batts Rock	SSID	3	5	2
P1	M3	Batts Rock	SSID	5	9	13.3333
P1	M3	Coconut Court	DSTR	1	107	5.92523
P1	M3	Coconut Court	DSTR	2	81	4.81481
P1	M3	Coconut Court	DSTR	3	23	23.913
P1	M3	Coconut Court	DSTR	5	33	11.0606
P1	M3	Coconut Court	ORBI	1	5	17
P1	M3	Coconut Court	ORBI	2	1	5
P1	M3	Coconut Court	MCAV	1	14	5
P1	M3	Coconut Court	MCAV	2	16	4.375
P1	M3	Coconut Court	MCAV	3	7	19.2857
P1	M3	Coconut Court	MCAV	5	4	0
P1	M3	Coconut Court	PAST	1	92	3.75
P1	M3	Coconut Court	PAST	2	138	0.57971
P1	M3	Coconut Court	PAST	3	80	35
P1	M3	Coconut Court	PAST	5	76	9.86842
P1	M3	Coconut Court	SSID	1	17	3.52941
P1	M3	Coconut Court	SSID	2	21	7.61905
P1	M3	Coconut Court	SSID	3	13	9.61538
P1	M3	Coconut Court	SSID	5	3	0
P1	M3	Maycocks	DSTR	1	14	9.71429
P1	M3	Maycocks	DSTR	2	9	3
P1	M3	Maycocks	DSTR	3	4	20
P1	M3	Maycocks	DSTR	5	6	0
P1	M3	Maycocks	ORBI	1	30	31.6333
P1	M3	Maycocks	ORBI	2	26	28.6923
P1	M3	Maycocks	ORBI	3	55	57.7273
P1	M3	Maycocks	ORBI	5	28	25.6429
P1	M3	Maycocks	MCAV	1	34	5
P1	M3	Maycocks	MCAV	2	29	8
P1	M3	Maycocks	MCAV	3	16	28.75
P1	M3	Maycocks	MCAV	5	31	1.6129
P1	M3	Maycocks	PAST	1	76	4.86842
P1	M3	Maycocks	PAST	2	48	1.47917
P1	M3	Maycocks	PAST	3	14	9.28571
P1	M3	Maycocks	PAST	5	51	0.980392
P1	M3	Maycocks	SSID	1	25	6
P1	M3	Maycocks	SSID	2	12	7.41667
P1	M3	Maycocks	SSID	3	3	33.3333
P1	M3	Maycocks	SSID	5	4	17.5
P1	M3	North Bellairs	DSTR	1	9	1.11111
P1	M3	North Bellairs	DSTR	2	1	10
P1	M3	North Bellairs	DSTR	5	1	0
P1	M3	North Bellairs	ORBI	1	11	22.2727
P1	M3	North Bellairs	ORBI	2	4	31.25
P1	M3	North Bellairs	ORBI	3	1	80
P1	M3	North Bellairs	ORBI	5	8	100
P1	M3	North Bellairs	PAST	1	173	8.07514
P1	M3	North Bellairs	PAST	2	126	5.48413
P1	M3	North Bellairs	PAST	3	53	28.4906
P1	M3	North Bellairs	PAST	5	164	5.7622
P1	M3	North Bellairs	SSID	1	4	2.5
P1	M3	North Bellairs	SSID	2	1	20
P1	M3	North Bellairs	SSID	3	1	2
P1	M3	Welcome Inn	DSTR	1	23	8.47826
P1	M3	Welcome Inn	DSTR	2	2	0
P1	M3	Welcome Inn	DSTR	3	7	32.1429
P1	M3	Welcome Inn	DSTR	5	2	0
P1	M3	Welcome Inn	ORBI	1	7	0.428571
P1	M3	Welcome Inn	ORBI	2	7	9.28571
P1	M3	Welcome Inn	ORBI	3	7	30
P1	M3	Welcome Inn	ORBI	5	5	2
P1	M3	Welcome Inn	MCAV	1	47	14.0213
P1	M3	Welcome Inn	MCAV	2	22	9.54545
P1	M3	Welcome Inn	MCAV	3	31	34.5161
P1	M3	Welcome Inn	MCAV	5	38	7.34211
P1	M3	Welcome Inn	PAST	1	47	9.89362
P1	M3	Welcome Inn	PAST	2	24	0.708333
P1	M3	Welcome Inn	PAST	3	12	13.75
P1	M3	Welcome Inn	PAST	5	34	1.32353
P1	M3	Welcome Inn	SSID	1	53	14.3208
P1	M3	Welcome Inn	SSID	2	12	9.5
P1	M3	Welcome Inn	SSID	3	27	44.4444
P1	M3	Welcome Inn	SSID	5	19	3.94737
P2	M2	Atlantis	DSTR	37	8	17.5
P2	M2	Atlantis	DSTR	38	5	0
P2	M2	Atlantis	DSTR	39	13	0
P2	M2	Atlantis	DSTR	56	4	0
P2	M2	Atlantis	DSTR	57	5	0
P2	M2	Atlantis	ORBI	37	17	2.05882
P2	M2	Atlantis	ORBI	38	15	2.13333
P2	M2	Atlantis	ORBI	39	26	3.46154
P2	M2	Atlantis	ORBI	56	13	0.307692
P2	M2	Atlantis	ORBI	57	16	0.125
P2	M2	Atlantis	MCAV	37	44	1.25
P2	M2	Atlantis	MCAV	38	15	0
P2	M2	Atlantis	MCAV	39	47	0.851064
P2	M2	Atlantis	MCAV	56	16	0
P2	M2	Atlantis	MCAV	57	24	0
P2	M2	Atlantis	PAST	37	46	0
P2	M2	Atlantis	PAST	38	7	1.42857
P2	M2	Atlantis	PAST	39	49	2.2449
P2	M2	Atlantis	PAST	56	31	0
P2	M2	Atlantis	PAST	57	21	0
P2	M2	Atlantis	SSID	37	6	1.33333
P2	M2	Atlantis	SSID	38	18	6.11111
P2	M2	Atlantis	SSID	39	22	0.954545
P2	M2	Atlantis	SSID	56	17	3.58824
P2	M2	Atlantis	SSID	57	16	0
P2	M2	Batts Rock	DSTR	53	2	0
P2	M2	Batts Rock	DSTR	54	4	0
P2	M2	Batts Rock	DSTR	55	3	0
P2	M2	Batts Rock	DSTR	58	7	1.42857
P2	M2	Batts Rock	DSTR	59	6	0
P2	M2	Batts Rock	ORBI	53	96	0.270833
P2	M2	Batts Rock	ORBI	54	74	0.337838
P2	M2	Batts Rock	ORBI	55	63	2.06349
P2	M2	Batts Rock	ORBI	58	98	0
P2	M2	Batts Rock	ORBI	59	99	0.10101
P2	M2	Batts Rock	MCAV	53	4	0
P2	M2	Batts Rock	MCAV	54	5	0
P2	M2	Batts Rock	MCAV	55	6	0
P2	M2	Batts Rock	MCAV	58	3	6.66667
P2	M2	Batts Rock	MCAV	59	1	0
P2	M2	Batts Rock	PAST	53	25	4
P2	M2	Batts Rock	PAST	54	19	0
P2	M2	Batts Rock	PAST	55	13	0
P2	M2	Batts Rock	PAST	58	17	2.47059
P2	M2	Batts Rock	PAST	59	11	0
P2	M2	Batts Rock	SSID	53	6	0
P2	M2	Batts Rock	SSID	54	9	0
P2	M2	Batts Rock	SSID	55	3	0.666667
P2	M2	Batts Rock	SSID	58	6	10
P2	M2	Batts Rock	SSID	59	1	0
P2	M2	Coconut Court	DSTR	45	50	0
P2	M2	Coconut Court	DSTR	46	25	0
P2	M2	Coconut Court	DSTR	47	42	1.54762
P2	M2	Coconut Court	DSTR	48	38	0
P2	M2	Coconut Court	DSTR	49	31	0
P2	M2	Coconut Court	ORBI	45	2	0
P2	M2	Coconut Court	MCAV	45	8	0
P2	M2	Coconut Court	MCAV	46	1	0
P2	M2	Coconut Court	MCAV	47	4	0
P2	M2	Coconut Court	MCAV	48	5	0
P2	M2	Coconut Court	MCAV	49	3	0
P2	M2	Coconut Court	PAST	45	166	0.301205
P2	M2	Coconut Court	PAST	46	110	0
P2	M2	Coconut Court	PAST	47	212	0
P2	M2	Coconut Court	PAST	48	205	0.0731707
P2	M2	Coconut Court	PAST	49	147	0.918367
P2	M2	Coconut Court	SSID	45	13	0.153846
P2	M2	Coconut Court	SSID	46	10	0.5
P2	M2	Coconut Court	SSID	47	15	0
P2	M2	Coconut Court	SSID	48	11	0
P2	M2	Coconut Court	SSID	49	11	0
P2	M2	Maycocks	DSTR	32	7	0
P2	M2	Maycocks	DSTR	33	6	0
P2	M2	Maycocks	DSTR	34	5	0
P2	M2	Maycocks	DSTR	35	9	5.77778
P2	M2	Maycocks	DSTR	36	5	0
P2	M2	Maycocks	ORBI	32	16	0
P2	M2	Maycocks	ORBI	33	7	0
P2	M2	Maycocks	ORBI	34	14	0.5
P2	M2	Maycocks	ORBI	35	12	0
P2	M2	Maycocks	ORBI	36	17	0.294118
P2	M2	Maycocks	MCAV	32	18	0
P2	M2	Maycocks	MCAV	33	34	0
P2	M2	Maycocks	MCAV	34	13	0.153846
P2	M2	Maycocks	MCAV	35	16	0
P2	M2	Maycocks	MCAV	36	18	0
P2	M2	Maycocks	PAST	32	50	0
P2	M2	Maycocks	PAST	33	42	0
P2	M2	Maycocks	PAST	34	43	0
P2	M2	Maycocks	PAST	35	29	0.344828
P2	M2	Maycocks	PAST	36	45	0
P2	M2	Maycocks	SSID	32	9	0
P2	M2	Maycocks	SSID	33	4	0
P2	M2	Maycocks	SSID	34	8	0
P2	M2	Maycocks	SSID	35	7	0
P2	M2	Maycocks	SSID	36	5	0
P2	M2	North Bellairs	DSTR	50	3	0
P2	M2	North Bellairs	DSTR	52	1	0
P2	M2	North Bellairs	DSTR	60	1	0
P2	M2	North Bellairs	ORBI	51	8	0.625
P2	M2	North Bellairs	ORBI	52	1	5
P2	M2	North Bellairs	ORBI	60	12	6.41667
P2	M2	North Bellairs	ORBI	61	16	0
P2	M2	North Bellairs	MCAV	50	1	0
P2	M2	North Bellairs	PAST	50	93	0
P2	M2	North Bellairs	PAST	51	63	0
P2	M2	North Bellairs	PAST	52	139	0
P2	M2	North Bellairs	PAST	60	126	0.634921
P2	M2	North Bellairs	PAST	61	83	0
P2	M2	North Bellairs	SSID	50	3	1.66667
P2	M2	North Bellairs	SSID	51	2	0
P2	M2	North Bellairs	SSID	52	4	0
P2	M2	North Bellairs	SSID	60	11	0
P2	M2	Welcome Inn	DSTR	40	9	0
P2	M2	Welcome Inn	DSTR	41	9	0
P2	M2	Welcome Inn	DSTR	42	9	0
P2	M2	Welcome Inn	DSTR	43	5	10
P2	M2	Welcome Inn	DSTR	44	3	0
P2	M2	Welcome Inn	ORBI	40	6	0
P2	M2	Welcome Inn	ORBI	41	8	6.875
P2	M2	Welcome Inn	ORBI	42	10	2
P2	M2	Welcome Inn	ORBI	43	5	0
P2	M2	Welcome Inn	ORBI	44	5	0
P2	M2	Welcome Inn	MCAV	40	43	1.23256
P2	M2	Welcome Inn	MCAV	41	25	4.48
P2	M2	Welcome Inn	MCAV	42	41	0.365854
P2	M2	Welcome Inn	MCAV	43	43	0.348837
P2	M2	Welcome Inn	MCAV	44	30	0
P2	M2	Welcome Inn	PAST	40	21	4.7619
P2	M2	Welcome Inn	PAST	41	18	0
P2	M2	Welcome Inn	PAST	42	18	0
P2	M2	Welcome Inn	PAST	43	16	0
P2	M2	Welcome Inn	PAST	44	25	0.2
P2	M2	Welcome Inn	SSID	40	12	5.25
P2	M2	Welcome Inn	SSID	41	35	1.42857
P2	M2	Welcome Inn	SSID	42	39	0.512821
P2	M2	Welcome Inn	SSID	43	20	4.25
P2	M2	Welcome Inn	SSID	44	9	0
P2	M3	Atlantis	DSTR	73	6	16.6667
P2	M3	Atlantis	DSTR	74	2	0
P2	M3	Atlantis	DSTR	75	5	0
P2	M3	Atlantis	DSTR	76	12	0
P2	M3	Atlantis	DSTR	77	6	0.166667
P2	M3	Atlantis	ORBI	73	20	0.15
P2	M3	Atlantis	ORBI	74	33	0.30303
P2	M3	Atlantis	ORBI	75	28	6.07143
P2	M3	Atlantis	ORBI	76	17	1.29412
P2	M3	Atlantis	ORBI	77	17	5.88235
P2	M3	Atlantis	MCAV	73	54	0
P2	M3	Atlantis	MCAV	74	20	0
P2	M3	Atlantis	MCAV	75	35	0
P2	M3	Atlantis	MCAV	76	35	0
P2	M3	Atlantis	MCAV	77	12	0
P2	M3	Atlantis	PAST	73	40	0
P2	M3	Atlantis	PAST	74	58	0.344828
P2	M3	Atlantis	PAST	75	66	1.9697
P2	M3	Atlantis	PAST	76	42	0
P2	M3	Atlantis	PAST	77	37	2.7027
P2	M3	Atlantis	SSID	73	15	0
P2	M3	Atlantis	SSID	74	20	7
P2	M3	Atlantis	SSID	75	13	15.3846
P2	M3	Atlantis	SSID	76	15	0
P2	M3	Atlantis	SSID	77	6	16.6667
P2	M3	Batts Rock	DSTR	78	7	0
P2	M3	Batts Rock	DSTR	79	9	0
P2	M3	Batts Rock	DSTR	80	8	0
P2	M3	Batts Rock	DSTR	81	6	0
P2	M3	Batts Rock	DSTR	82	5	0
P2	M3	Batts Rock	ORBI	78	100	0.35
P2	M3	Batts Rock	ORBI	79	108	0.0925926
P2	M3	Batts Rock	ORBI	80	122	1.10656
P2	M3	Batts Rock	ORBI	81	129	0.155039
P2	M3	Batts Rock	ORBI	82	44	2.29545
P2	M3	Batts Rock	MCAV	78	1	0
P2	M3	Batts Rock	MCAV	79	2	0
P2	M3	Batts Rock	MCAV	80	1	0
P2	M3	Batts Rock	MCAV	81	5	0
P2	M3	Batts Rock	MCAV	82	1	0
P2	M3	Batts Rock	PAST	78	35	0.0285714
P2	M3	Batts Rock	PAST	79	49	0.408163
P2	M3	Batts Rock	PAST	80	85	1.29412
P2	M3	Batts Rock	PAST	81	24	0
P2	M3	Batts Rock	PAST	82	11	0
P2	M3	Batts Rock	SSID	78	3	0
P2	M3	Batts Rock	SSID	79	6	0
P2	M3	Batts Rock	SSID	80	4	0
P2	M3	Batts Rock	SSID	81	2	0
P2	M3	Batts Rock	SSID	82	4	25
P2	M3	Coconut Court	DSTR	58	54	0
P2	M3	Coconut Court	DSTR	59	28	0
P2	M3	Coconut Court	DSTR	60	60	0
P2	M3	Coconut Court	DSTR	61	39	0
P2	M3	Coconut Court	DSTR	62	35	0
P2	M3	Coconut Court	ORBI	59	1	0
P2	M3	Coconut Court	ORBI	60	1	0
P2	M3	Coconut Court	ORBI	61	1	0
P2	M3	Coconut Court	ORBI	62	1	0
P2	M3	Coconut Court	MCAV	58	5	0
P2	M3	Coconut Court	MCAV	59	9	0
P2	M3	Coconut Court	MCAV	60	6	0
P2	M3	Coconut Court	MCAV	61	3	0
P2	M3	Coconut Court	MCAV	62	8	0
P2	M3	Coconut Court	PAST	58	209	0.382775
P2	M3	Coconut Court	PAST	59	368	0.163043
P2	M3	Coconut Court	PAST	60	221	0.542986
P2	M3	Coconut Court	PAST	61	118	0
P2	M3	Coconut Court	PAST	62	195	0
P2	M3	Coconut Court	SSID	58	7	0
P2	M3	Coconut Court	SSID	59	9	0
P2	M3	Coconut Court	SSID	60	25	0.4
P2	M3	Coconut Court	SSID	61	9	0
P2	M3	Coconut Court	SSID	62	3	66.6667
P2	M3	Maycocks	DSTR	68	8	6.25
P2	M3	Maycocks	DSTR	69	7	0
P2	M3	Maycocks	DSTR	70	9	0
P2	M3	Maycocks	DSTR	71	6	0
P2	M3	Maycocks	DSTR	72	13	0
P2	M3	Maycocks	ORBI	68	21	1.04762
P2	M3	Maycocks	ORBI	69	18	0.833333
P2	M3	Maycocks	ORBI	70	18	0
P2	M3	Maycocks	ORBI	71	44	2.38636
P2	M3	Maycocks	ORBI	72	14	0
P2	M3	Maycocks	MCAV	68	27	0
P2	M3	Maycocks	MCAV	69	21	2.38095
P2	M3	Maycocks	MCAV	70	27	0
P2	M3	Maycocks	MCAV	71	34	0
P2	M3	Maycocks	MCAV	72	17	0
P2	M3	Maycocks	PAST	68	71	0
P2	M3	Maycocks	PAST	69	99	0.484848
P2	M3	Maycocks	PAST	70	48	0
P2	M3	Maycocks	PAST	71	80	0.375
P2	M3	Maycocks	PAST	72	40	0
P2	M3	Maycocks	SSID	68	11	0.181818
P2	M3	Maycocks	SSID	69	11	0
P2	M3	Maycocks	SSID	70	11	0.909091
P2	M3	Maycocks	SSID	71	13	0.769231
P2	M3	Maycocks	SSID	72	5	0
P2	M3	North Bellairs	DSTR	84	3	0
P2	M3	North Bellairs	DSTR	87	8	0
P2	M3	North Bellairs	ORBI	83	21	0
P2	M3	North Bellairs	ORBI	84	5	0
P2	M3	North Bellairs	ORBI	85	24	0.208333
P2	M3	North Bellairs	ORBI	86	1	5
P2	M3	North Bellairs	ORBI	87	5	1.4
P2	M3	North Bellairs	MCAV	83	2	0
P2	M3	North Bellairs	PAST	83	70	0
P2	M3	North Bellairs	PAST	84	109	0.183486
P2	M3	North Bellairs	PAST	85	119	0
P2	M3	North Bellairs	PAST	86	90	1.83333
P2	M3	North Bellairs	PAST	87	44	2.27273
P2	M3	North Bellairs	SSID	83	3	0
P2	M3	North Bellairs	SSID	84	3	0
P2	M3	North Bellairs	SSID	85	6	0
P2	M3	North Bellairs	SSID	87	5	1
P2	M3	Welcome Inn	DSTR	63	7	0
P2	M3	Welcome Inn	DSTR	64	6	0
P2	M3	Welcome Inn	DSTR	65	12	0
P2	M3	Welcome Inn	DSTR	66	4	0
P2	M3	Welcome Inn	DSTR	67	17	0
P2	M3	Welcome Inn	ORBI	63	8	2.5
P2	M3	Welcome Inn	ORBI	64	11	0.181818
P2	M3	Welcome Inn	ORBI	65	12	0
P2	M3	Welcome Inn	ORBI	66	9	0
P2	M3	Welcome Inn	ORBI	67	7	0
P2	M3	Welcome Inn	MCAV	63	38	0.921053
P2	M3	Welcome Inn	MCAV	64	55	1.81818
P2	M3	Welcome Inn	MCAV	65	44	0.340909
P2	M3	Welcome Inn	MCAV	66	38	0
P2	M3	Welcome Inn	MCAV	67	26	0
P2	M3	Welcome Inn	PAST	63	37	0.135135
P2	M3	Welcome Inn	PAST	64	35	6.42857
P2	M3	Welcome Inn	PAST	65	36	0.138889
P2	M3	Welcome Inn	PAST	66	15	3.33333
P2	M3	Welcome Inn	PAST	67	13	0
P2	M3	Welcome Inn	SSID	63	19	0
P2	M3	Welcome Inn	SSID	64	36	0.611111
P2	M3	Welcome Inn	SSID	65	33	0
P2	M3	Welcome Inn	SSID	66	17	0
P2	M3	Welcome Inn	SSID	67	26	0
